# Supplementary material
Source: Springer Nature journal article supplement (https://www.springermedizin.de/resource/supplementary/12935_2010_261_MOESM3_ESM.pdf/9540170)

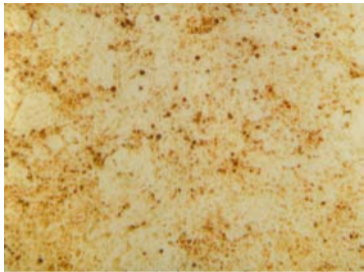

**(a)** -HC/-EGF; +PHR

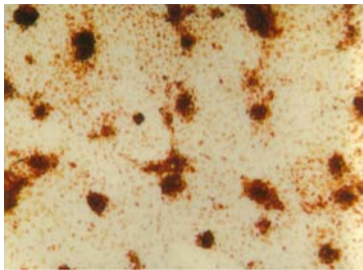

**(b)** -HC/-EGF; -PHR

Supplement: MOESM3 [file 9540170]
